# Supplementary figures and images for: Targeting the Nrf2/ARE Signalling Pathway to Mitigate Isoproterenol-Induced Cardiac Hypertrophy: Plausible Role of Hesperetin in Redox Homeostasis
Source: Hindawi journal article supplement (doi:10.1155/2020/9568278), 2020-09-01

Supplementary Figure 1

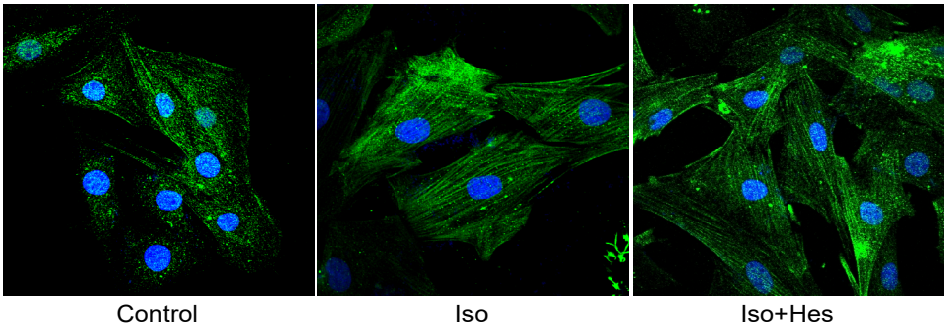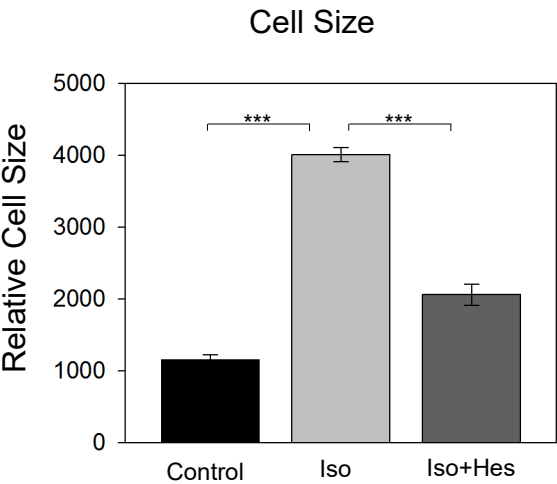

Supplement: f1 [file 9568278.f1.zip]
